# Supplementary material for: Development and structural basis of a two-MAb cocktail for treating SARS-CoV-2 infections
Source: PubMed Central journal article supplement (PMC7801428; doi:10.1038/s41467-020-20465-w), 2021-01-11
Supplement: 41467_2020_20465_MOESM1_ESM.pdf [file 41467_2020_20465_MOESM1_ESM.pdf]

## Supplementary Information for:

### Development and structural basis of a two-MAb cocktail for treating SARS-CoV-2 infections

Chao Zhang<sup>1, #</sup>, Yifan Wang<sup>2, #</sup>, Yuanfei Zhu<sup>3, #</sup>, Caixuan Liu<sup>2, #</sup>, Chenjian Gu<sup>3, #</sup>, Shiqi Xu<sup>1, #</sup>, Yalei Wang<sup>1</sup>, Yu Zhou<sup>1</sup>, Yanxing Wang<sup>2, 4</sup>, Wenyu Han<sup>2</sup>, Xiaoyu Hong<sup>2</sup>, Yong Yang<sup>1</sup>, Xueyang Zhang<sup>1</sup>, Tingfeng Wang<sup>1</sup>, Cong Xu<sup>2</sup>, Qin Hong<sup>2</sup>, Shutian Wang<sup>2</sup>, Qiaoyu Zhao<sup>2</sup>, Weihua Qiao<sup>1</sup>, Jinkai Zang<sup>1</sup>, Liangliang Kong<sup>5</sup>, Fangfang Wang<sup>5</sup>, Haikun Wang<sup>1</sup>, Di Qu<sup>3, 6</sup>, Dimitri Lavillette<sup>1</sup>, Hong Tang<sup>1</sup>, Qiang Deng<sup>3, \*</sup>, Youhua Xie<sup>3, \*</sup>, Yao Cong<sup>2, 4, \*</sup>, Zhong Huang<sup>1, \*</sup>

<sup>1</sup> CAS Key Laboratory of Molecular Virology & Immunology, Institut Pasteur of Shanghai, Chinese Academy of Sciences, University of Chinese Academy of Sciences, Shanghai, China

<sup>2</sup> State Key Laboratory of Molecular Biology, National Center for Protein Science Shanghai, Shanghai Institute of Biochemistry and Cell Biology, Center for Excellence in Molecular Cell Science, Chinese Academy of Sciences, University of Chinese Academy of Sciences, Shanghai, China

<sup>3</sup> Key Laboratory of Medical Molecular Virology (MOE/NHC/CAMS), Department of Medical Microbiology and Parasitology, School of Basic Medical Sciences, Shanghai Medical College, Fudan University, Shanghai, China

<sup>4</sup> Shanghai Science Research Center, Chinese Academy of Sciences, Shanghai 201210, China

<sup>5</sup>The National Facility for Protein Science in Shanghai (NFPS), Shanghai, 201210, China

<sup>6</sup> BSL-3 Laboratory of Fudan University, School of Basic Medical Sciences, Shanghai Medical College, Fudan University, Shanghai, China

# These authors contributed equally.

\* Corresponding authors.

**This Supplementary Information PDF includes:**

**Figures S1 – S12**

**Tables S1 – S4**

**a**

| No.              | Hybridoma ID | SARS-CoV-2 RBD (OD450nm) | Receptor binding inhibition (OD450nm) | SARS-CoV RBD (OD450nm) | Pseudovirus neutralization (luminescence) |
|------------------|--------------|--------------------------|---------------------------------------|------------------------|-------------------------------------------|
| 1                | 5A9          | 0.724                    | 0.665                                 | 0.056                  | 2455.4                                    |
| 2                | 5F4          | 0.446                    | 1.57                                  | 0.07                   | 3491.9                                    |
| 3                | 6A11         | 0.577                    | 1.58                                  | 0.438                  | 6452.6                                    |
| 4                | 6C11         | 0.689                    | 0.642                                 | 0.06                   | 4497                                      |
| 5                | 1A9          | 0.701                    | 0.66                                  | 0.058                  | 7063.6                                    |
| 6                | 1E3          | 0.727                    | 1.246                                 | 0.056                  | 4284.1                                    |
| 7                | 1E8          | 0.877                    | 1.462                                 | 0.651                  | 9719.5                                    |
| 8                | 5D2          | 0.673                    | 1.196                                 | 0.078                  | 2977.7                                    |
| 9                | 5F8          | 0.762                    | 1.458                                 | 0.149                  | 1602.4                                    |
| 10               | 6F12A        | 0.88                     | 1.523                                 | 0.638                  | 2977.5                                    |
| 11               | 6F12B        | 0.708                    | 0.495                                 | 0.058                  | 846.9                                     |
| 12               | 8A12         | 0.763                    | 1.462                                 | 0.608                  | 3635                                      |
| 13               | 8B9          | 0.724                    | 1.483                                 | 0.349                  | 6878.6                                    |
| 14               | 8B10         | 0.833                    | 1.501                                 | 0.622                  | 6971.9                                    |
| 15               | 2C2          | 0.81                     | 1.46                                  | 0.623                  | 5162.3                                    |
| 16               | 3C1          | 0.724                    | 0.445                                 | 0.476                  | 563.1                                     |
| 17               | 4C4          | 0.648                    | 1.489                                 | 0.331                  | 5658.2                                    |
| 18               | 5G2          | 0.679                    | 0.941                                 | 0.055                  | 5852.8                                    |
| 19               | 1A10         | 0.884                    | 1.486                                 | 0.646                  | 1706.3                                    |
| 20               | 5A8          | 0.541                    | 1.492                                 | 0.056                  | 3848.3                                    |
| 21               | 5B3          | 0.573                    | 1.306                                 | 0.058                  | 7095.1                                    |
| 22               | 5C1          | 0.91                     | 1.437                                 | 0.689                  | 9805.2                                    |
| 23               | 5D3          | 0.65                     | 1.538                                 | 0.079                  | 3356.9                                    |
| 24               | 5D8          | 0.564                    | 1.392                                 | 0.066                  | 2800.4                                    |
| 25               | 2H2          | 0.725                    | 0.47                                  | 0.056                  | 158.6                                     |
| 26               | 6D11         | 0.543                    | 1.611                                 | 0.574                  | 4718.2                                    |
| 27               | 2B5          | 0.913                    | 1.443                                 | 0.055                  | 4099.9                                    |
| 28               | 2G3          | 0.845                    | 0.522                                 | 0.055                  | 133.6                                     |
| 29               | 3A2          | 0.747                    | 0.142                                 | 0.053                  | 192                                       |
| 30               | 4F12         | 0.656                    | 1.577                                 | 0.051                  | 4565.7                                    |
| 31               | 8D3          | 0.837                    | 0.463                                 | 0.056                  | 246.9                                     |
| ACE2-hFc only    |              |                          | 1.602                                 |                        |                                           |
| Pseudovirus only |              |                          |                                       |                        | 8497.7                                    |

**b**

| Assay                       | Number of positive clones |
|-----------------------------|---------------------------|
| SARS-CoV-2 RBD binding      | 31                        |
| Receptor binding inhibition | 9                         |
| SARS-CoV RBD binding        | 12                        |
| Pseudovirus neutralization  | 6                         |

**Supplementary Figure 1.** Characteristics of 31 anti-SARS-CoV-2 hybridoma clones. **(a)** Antibody-containing culture supernatants of SARS-CoV-2 hybridomas were tested for reactivity against the RBDs of SARS-CoV-2 and of SARS-CoV by ELISA, for their ability to block the ACE2-hFc/SARS-CoV-2 RBD binding by ELISA, and for neutralization of MLV/SARS-CoV-2 pseudovirus in Vero E6 cells. For the ACE2/RBD binding-inhibition assay, bound ACE2-hFc was detected with HRP-conjugated anti-human IgG secondary antibody, and ELISA signals that decreased by 50% or more compared with the ACE2-hFc only group (OD450 value = 1.602) were considered positive for receptor binding inhibition. For pseudovirus neutralization assay (in VeroE6-hACE2 cells), luminescence value of the pseudovirus only group is 8497.7, and thus luciferase signals that decreased below 1000 are considered positive for neutralizing activity. For each assay, the positive results are highlighted in light red color. The names of 10 hybridoma clones with receptor binding inhibitory activity are colored red. **(b)** Number of positive clones for each assay is summarized in the table.

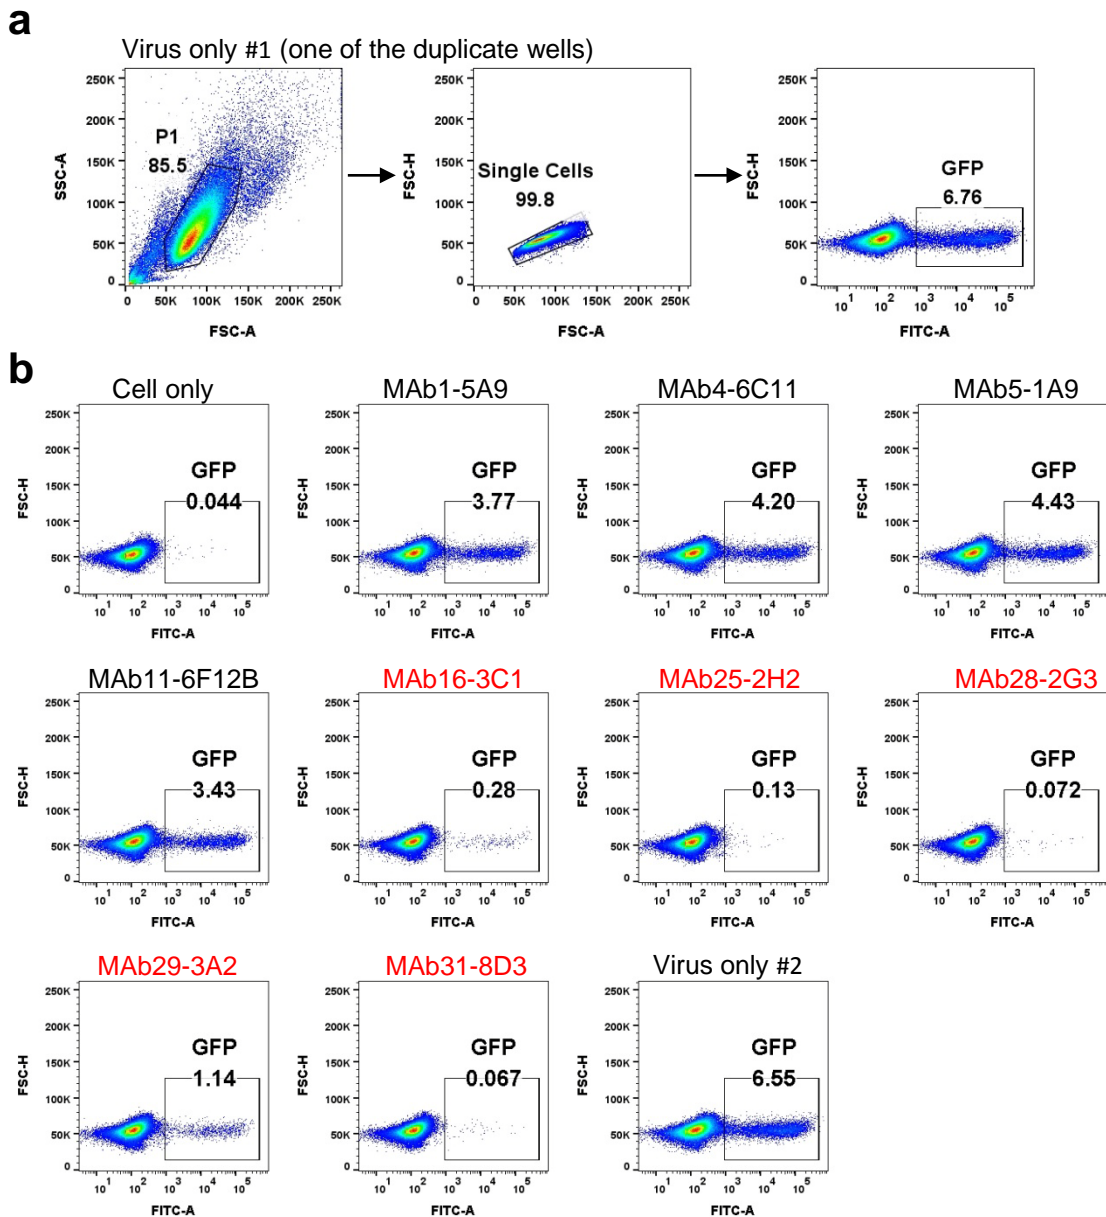

**Supplementary Figure 2.** Culture supernatants of the 9 hybridoma clones with receptor-binding inhibitory activity were further tested for neutralization of the GFP reporter gene-containing MLV/SARS-CoV-2 pseudovirions. **(a)** Representative FACS plots illustrating the gating strategy used in this study. GFP expression resulting from pseudovirus infection was analyzed by flow cytometry. **(b)** The percentage of GFP positive cells for each treatment was shown and a percentage less than 1.5% was considered potent neutralizing activity. The names of 5 hybridoma clones with strong neutralizing activity are colored red.

**a**

| MAb     | Heavy chain variable region |         |      |         | Light chain variable region |      |         |
|---------|-----------------------------|---------|------|---------|-----------------------------|------|---------|
|         | V                           | D       | J    | SHM (%) | V                           | J    | SHM (%) |
| MAb 3C1 | 3-8*02                      | 1-1*01  | 2*01 | 1.7     | 6-23*01                     | 2*01 | 2.1     |
| MAb 2H2 | 2-5-1*01                    | 1-1*02  | 4*01 | 1       | 3-10*01                     | 4*01 | 0.7     |
| MAb 2G3 | 1-12*01                     | 2-1*01  | 3*01 | 6.3     | 8-30*01                     | 5*01 | 1.3     |
| MAb 3A2 | 10-1*02                     | 2-10*02 | 3*01 | 1       | 1-110*01                    | 4*01 | 1       |
| MAb 8D3 | 1-18*01                     | 1-2*01  | 4*01 | 4.8     | 6-15*01                     | 2*01 | 0.4     |

**b**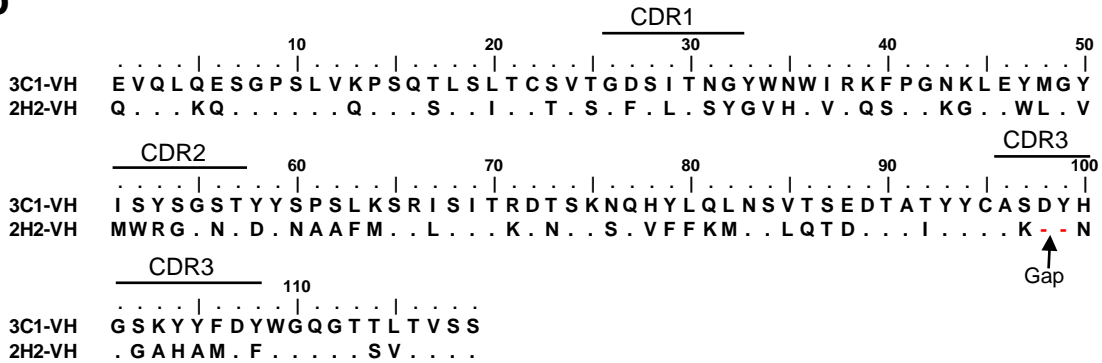**c**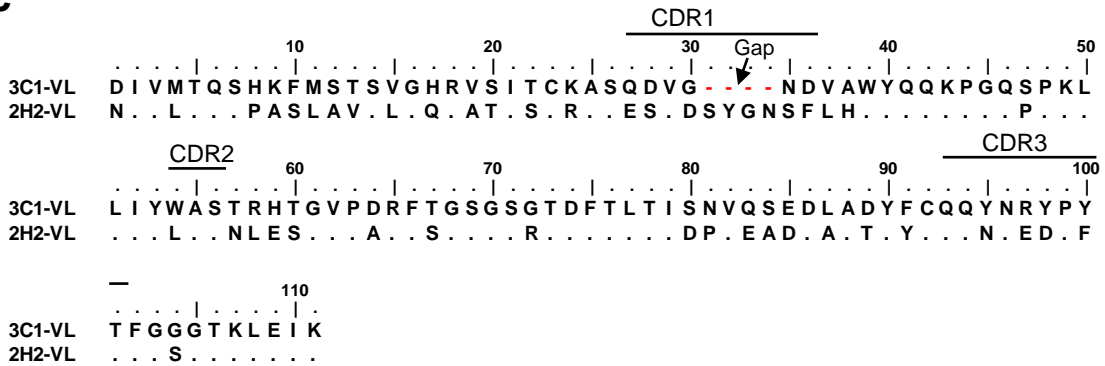

**Supplementary Figure 3.** Sequence analysis of the MAbs. **(a)** The closest mouse IgG germline genes were determined using IgBLAST. Somatic hypermutation (SHM) rate was calculated by comparing nucleotide sequences of variable regions of our antibodies to germline sequences. **(b-c)** Amino acid sequences of heavy-chain variable regions ( $V_H$ ) (b) and light-chain variable regions ( $V_L$ ) (c) of the 3C1 and 2H2 MAbs. Dots represent residues identical to those of MAb 3C1, and red dashes are gaps. Locations of complementarity determining regions (CDR) were identified by IgBLAST and indicated.

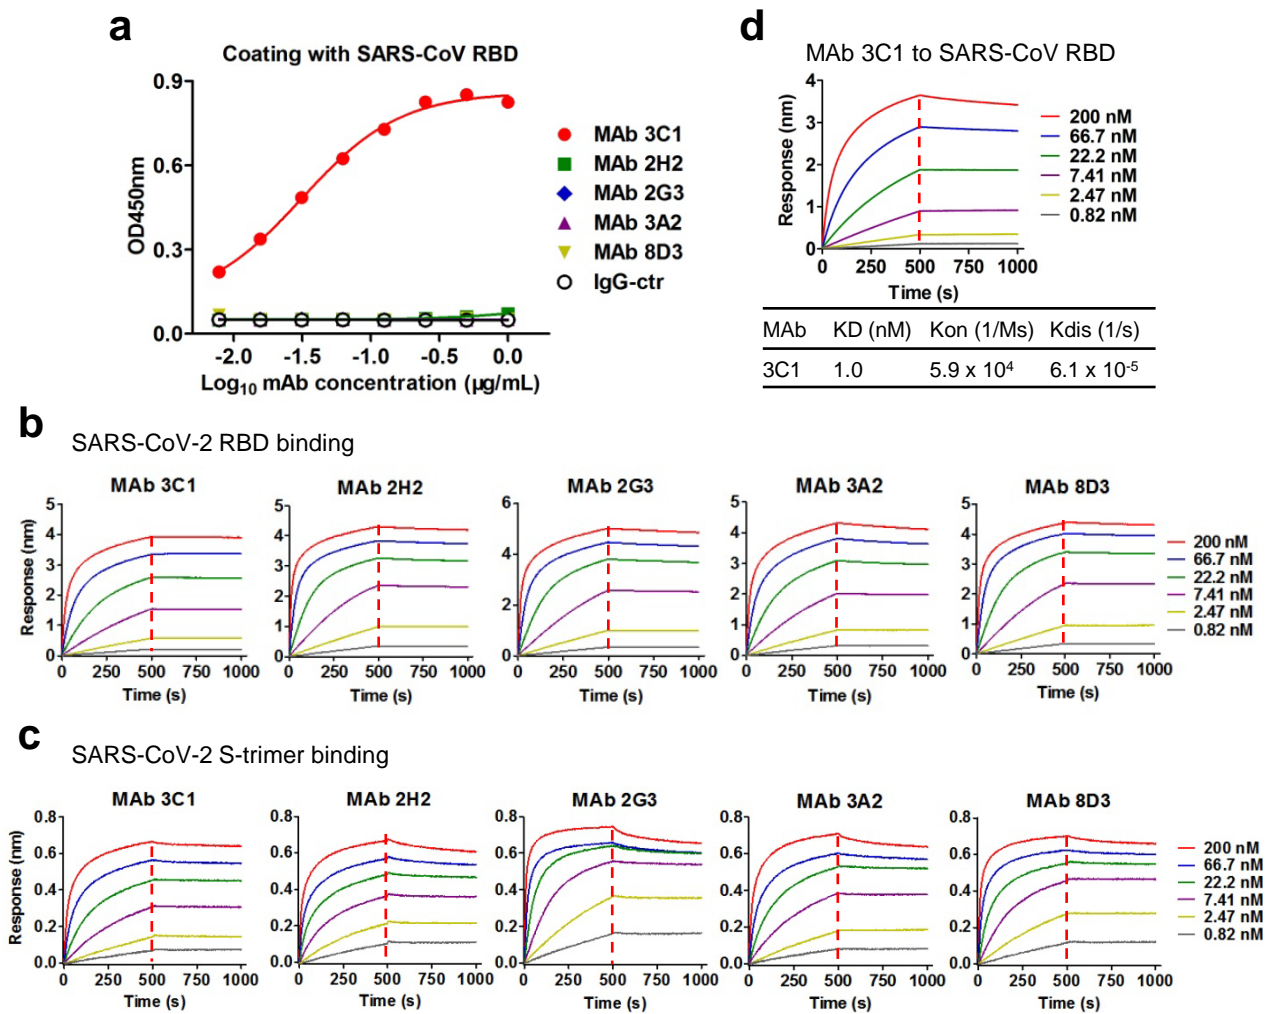

**Supplementary Figure 4.** Binding properties of the MAbs (related to Figure 1). **(a)** Cross-reactivities of anti-SARS-CoV-2 MAbs to the SARS-CoV RBD measured by ELISA. Data are mean  $\pm$  SEM of triplicate wells. **(b-c)** Binding kinetics of anti-SARS-CoV-2 MAbs to immobilized SARS-CoV-2 RBD (b) and S-trimer (c) measured by BLI. **(d)** Binding kinetics of MAb 3C1 to immobilized SARS-CoV RBD measured by BLI. For panels **b to d**, association and dissociation steps are divided by the dotted red line. Antibody concentrations used are shown.

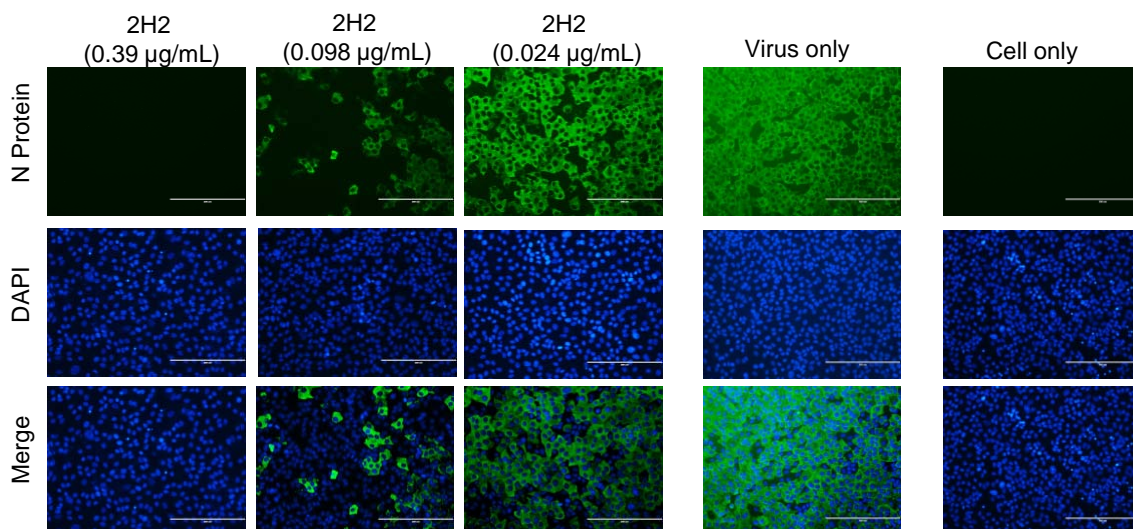

**Supplementary Figure 5.** Neutralization activity of the MAb 2H2 against authentic SARS-CoV-2 measured by immunofluorescence analysis. Live SARS-CoV-2 virus was incubated with serially diluted 2H2 prior to addition to VeroE6 cells. After two days, the cells were fixed and stained with N protein-specific antibody. Representative images of two independent experiments are shown. Bar, 400 µm.

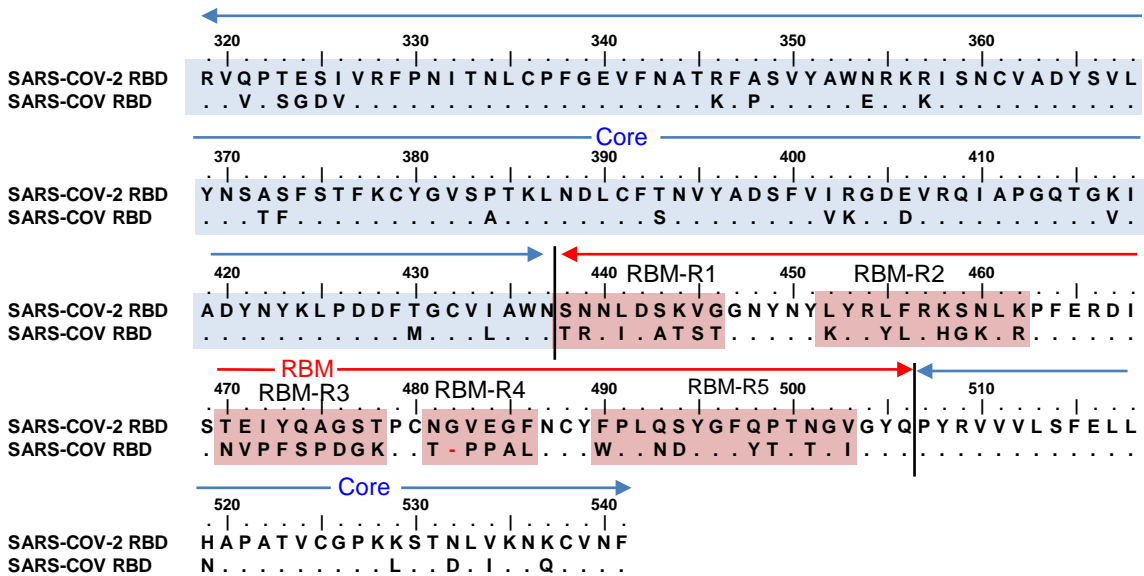

**Supplementary Figure 6.** Amino acid sequence alignment of RBD proteins from SARS-CoV-2 and SARS-CoV (related to Figure 2). The core and RBM regions in the RBD are indicated. N-terminal residues R319 to N437 (highlighted in light blue color) of core region in the SARS-CoV-2 RBD were mutated into the corresponding residues of SARS-CoV, resulting in cRBD (Core) mutant. The RBM has five sequence regions that exhibit considerable sequence differences between SARS-CoV-2 and SARS-CoV, and the five regions were termed RBM-R1, RBM-R2, RBM-R3, RBM-R4, and RBM-R5 and highlighted in light red color.



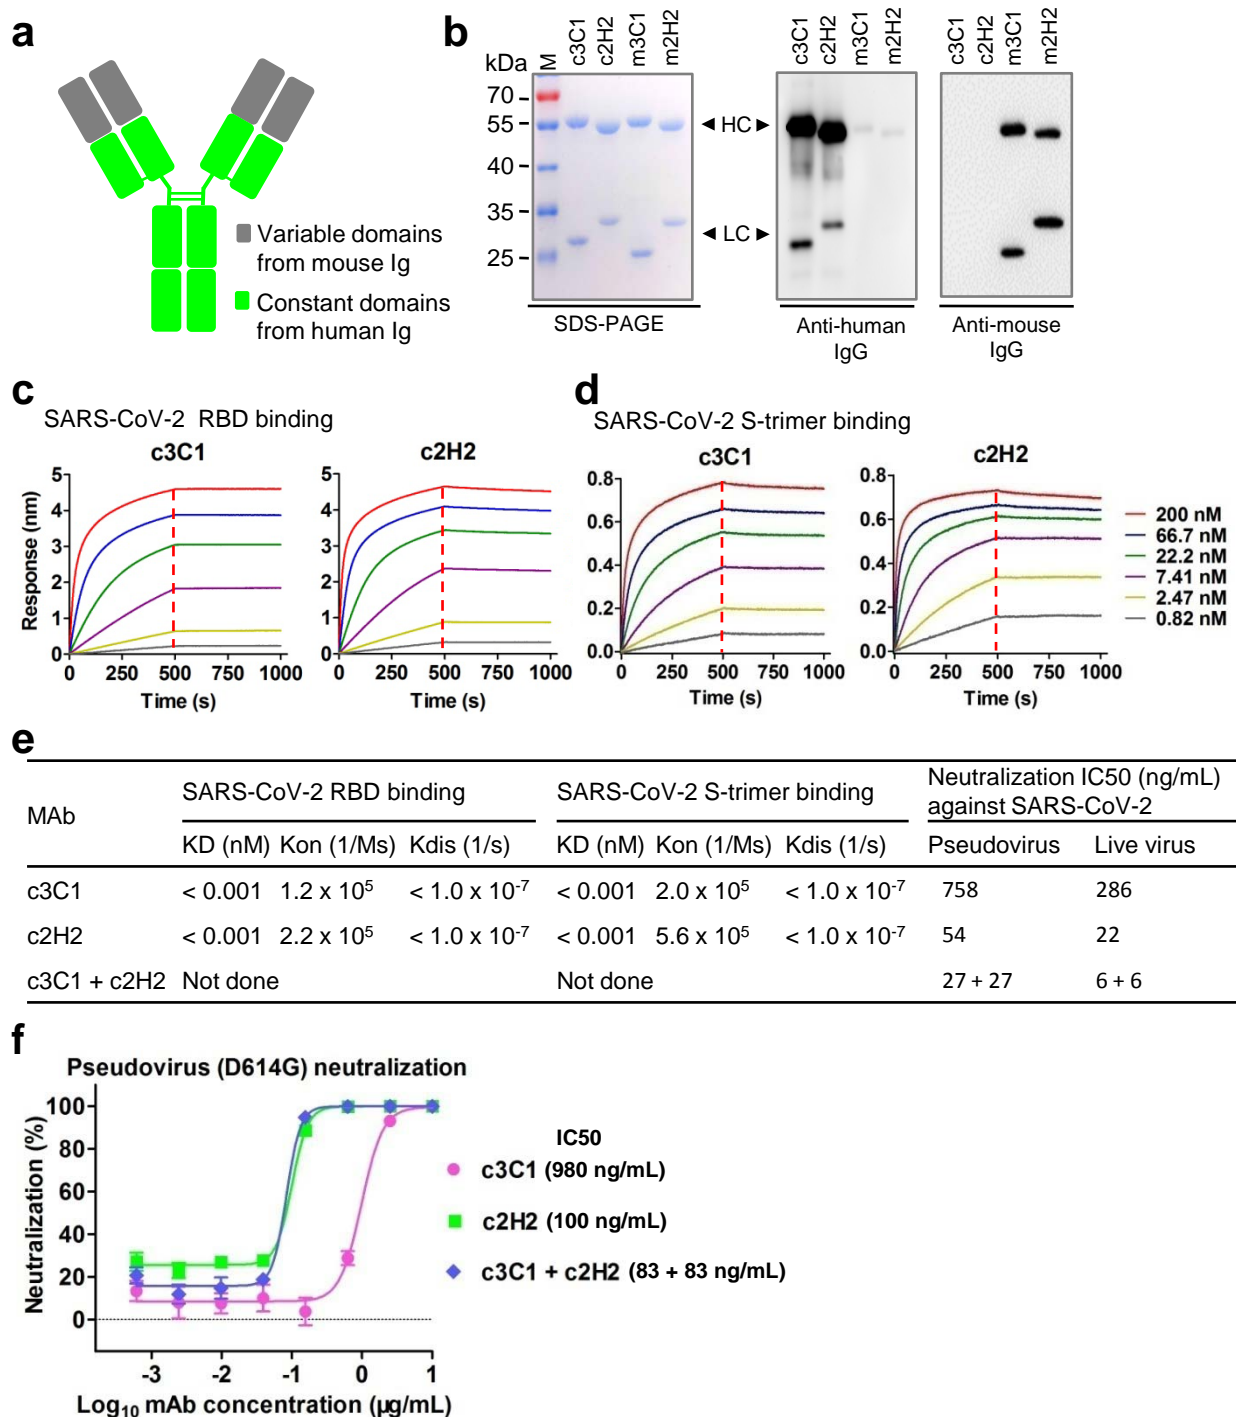

**Supplementary Figure 7.** Preparation and characteristics of the chimeric MAbs (related to Figure 2). **(a)** Schematic of chimeric MAb. Mouse variable domains and human constant domains are shown as gray and green boxes, respectively. **(b)** SDS-PAGE and western blotting analysis of purified chimeric MAbs. Representative images of two independent experiments are shown. Lane M, protein marker; c3C1, chimeric MAb 3C1; c2H2, chimeric MAb 2H2; m3C1, murine MAb 3C1; m2H2, murine MAb 2H2. **(c-d)** Binding kinetics of chimeric MAbs c3C1 and c2H2 to immobilized SARS-CoV-2 RBD (c) and S-trimer (d) were determined by BLI. **(e)** Summary of binding affinities and neutralization potency of the chimeric MAbs. **(f)** Neutralization activity of the chimeric antibodies against SARS-CoV-2 pseudovirus carrying the D614G mutation. c2H2 alone, c3C1 alone, and the c2H2/c3C1 (1:1) cocktail were serially diluted and assessed for neutralization of SARS-CoV-2 pseudovirus (D614G). Luciferase activity was measured two days after infection. For MAb cocktails, the concentration on the x axis is that of c2H2. Data are expressed as mean ± SEM of five replicate wells.



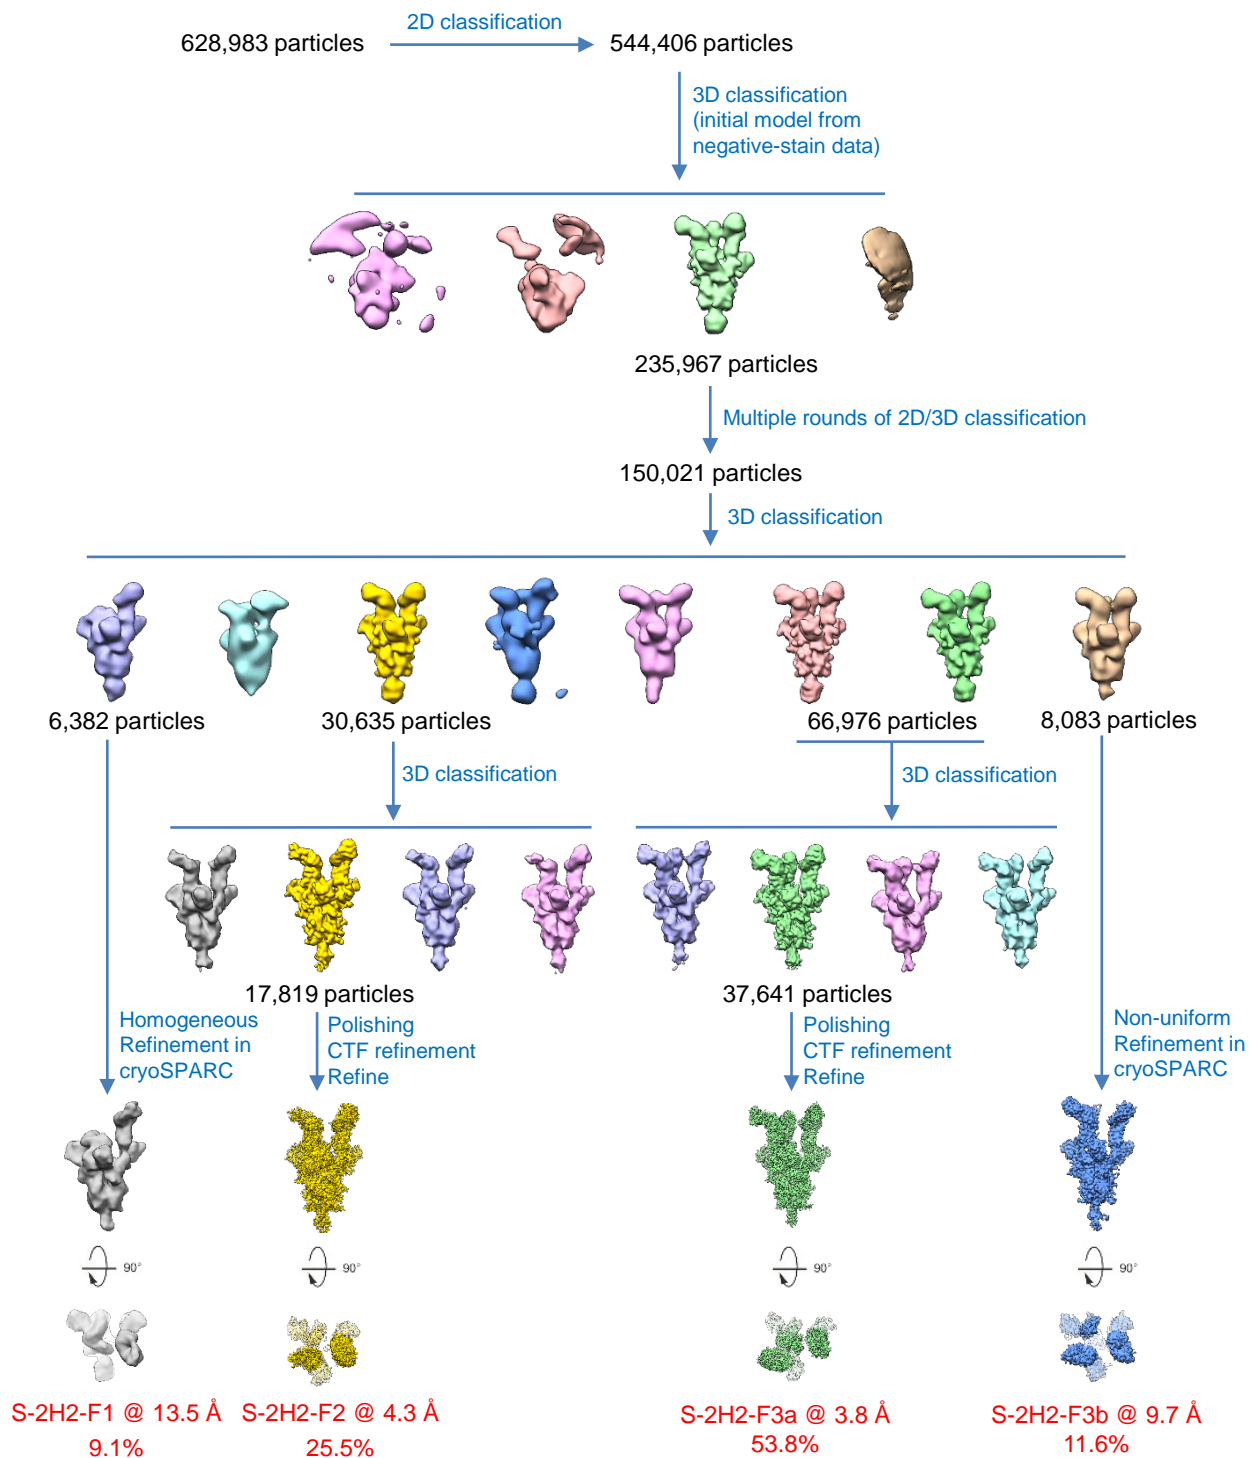

**Supplementary Figure 9.** Cryo-EM data processing procedure for SARS-CoV-2 S-2H2 dataset.

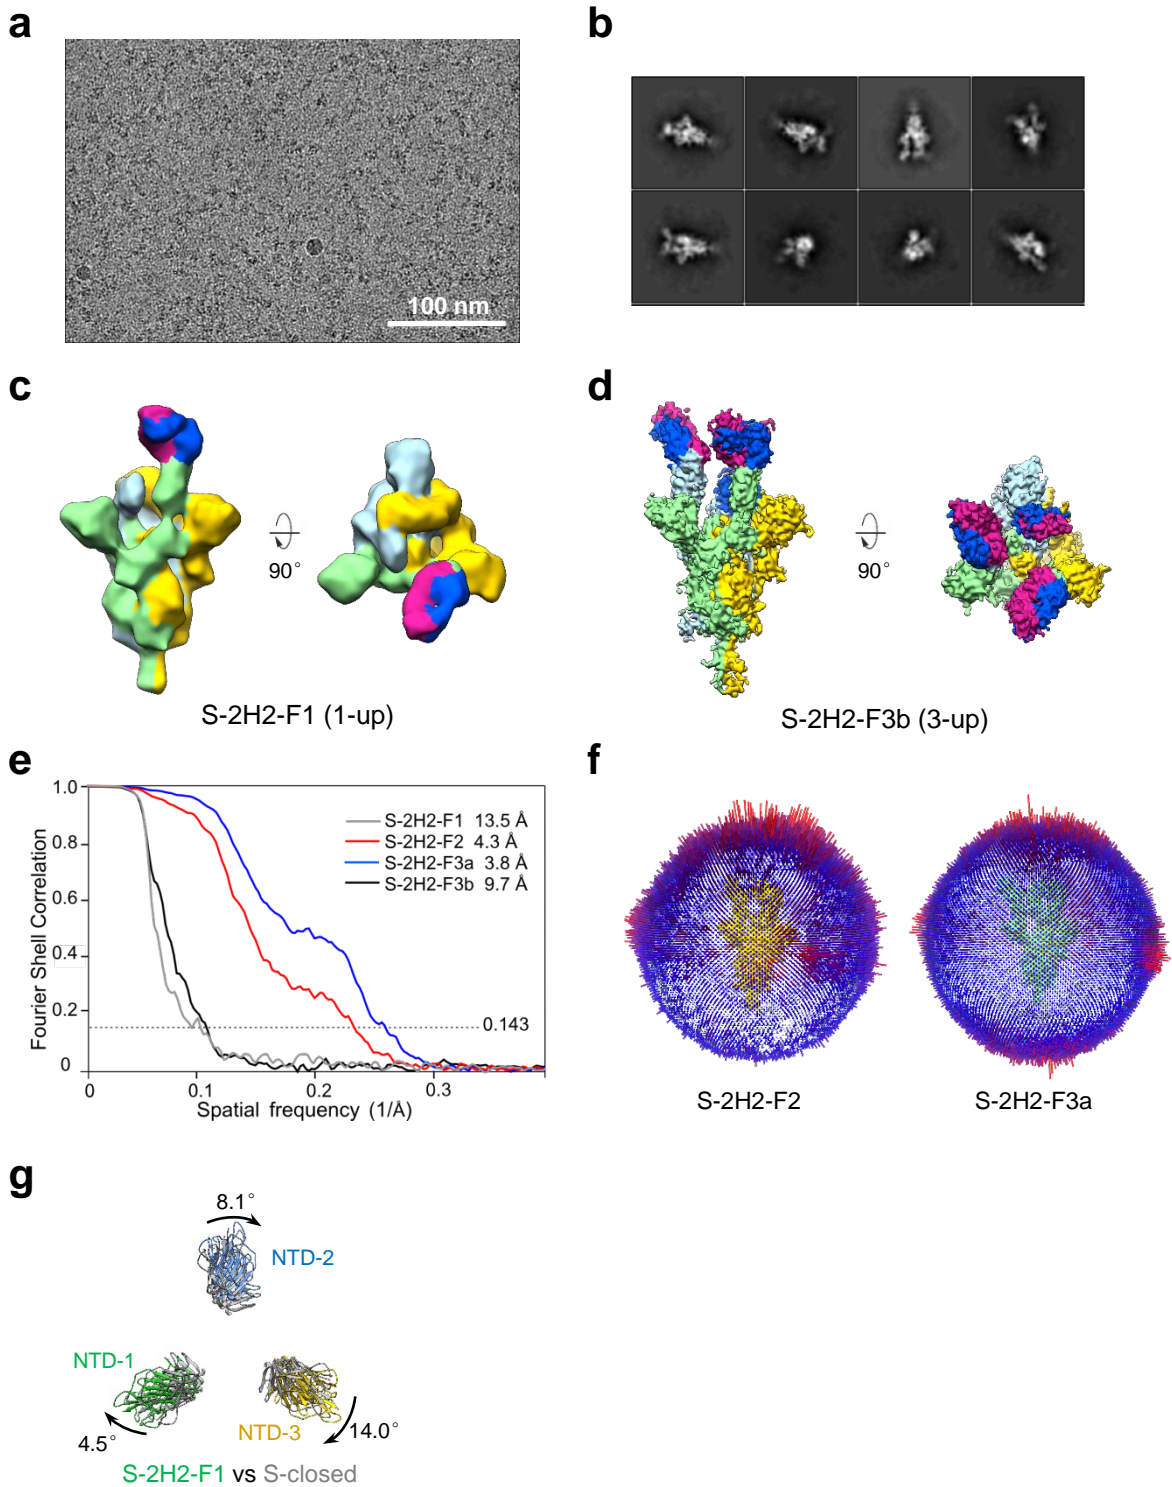

**Supplementary Figure 10.** Cryo-EM analysis on the SARS-CoV-2 S-2H2 complex. **(a)** A representative cryo-EM image of the S/2H2 Fab complex from 6888 micrographs is shown. Bar, 100nm. **(b)** Reference-free 2D class averages of the S-2H2 complex. **(c and d)** Side and top views of the cryo-EM maps of S-2H2-F1 (c) and S-2H2-F3b (d). **(e)** Resolution assessment of the cryo-EM reconstructions by Fourier shell correlation (FSC) at 0.143 criterion. **(f)** Euler-angle distribution of the better resolved S-2H2-F2 and S-2H2-F3a maps. **(g)** Overlaid NTDs of the S-2H2-F1 (in color) with the S-close state (in grey), revealing a clockwise untwist of S-2H2-F1.

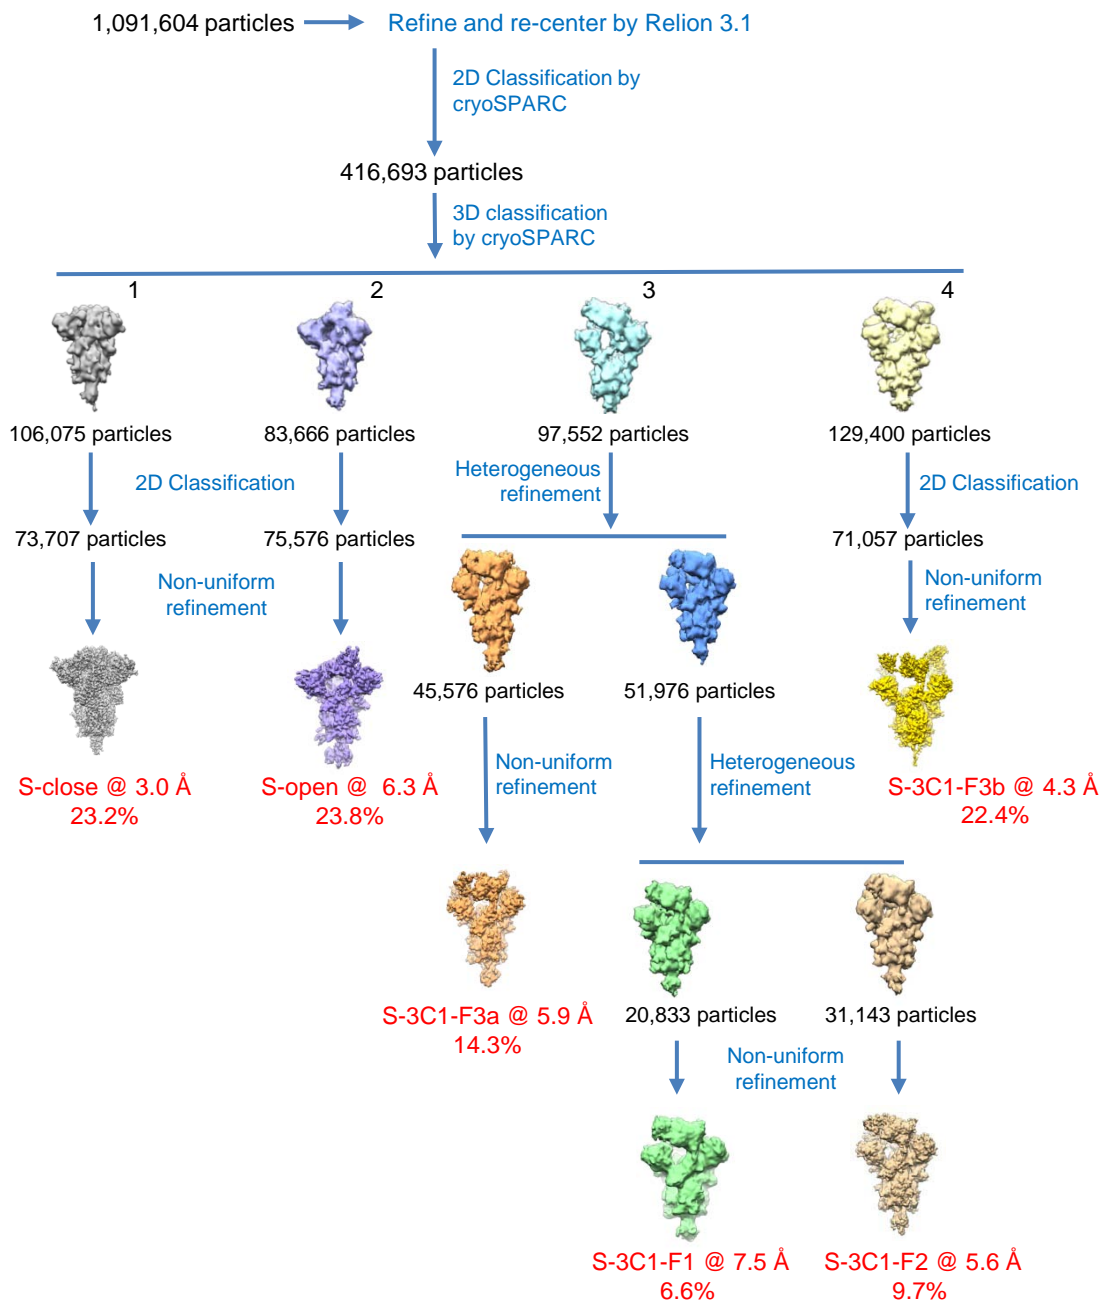

**Supplementary Figure 11.** Cryo-EM data processing procedure for SARS-CoV-2 S-3C1 dataset.



**a**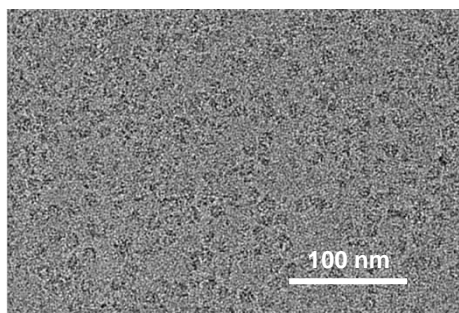**b**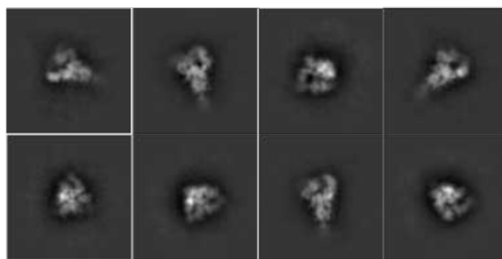**c**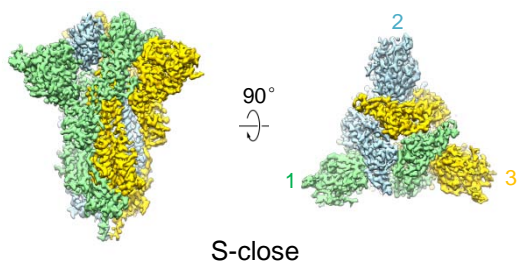**d**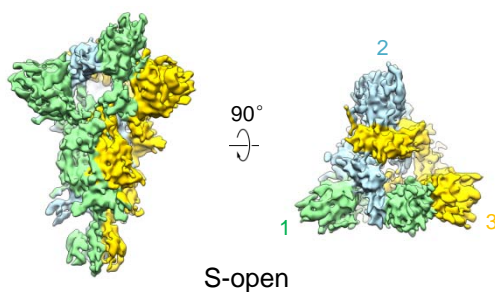**e**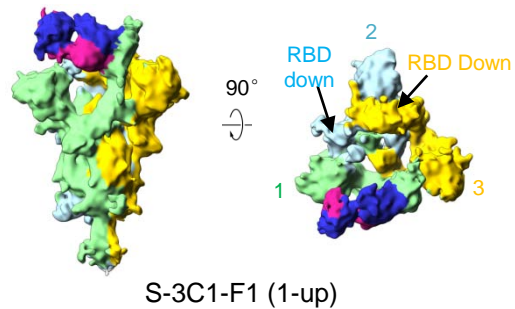**f**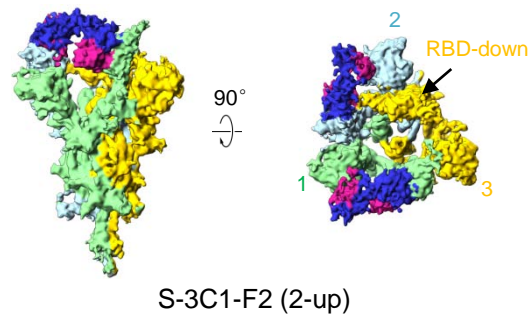**g**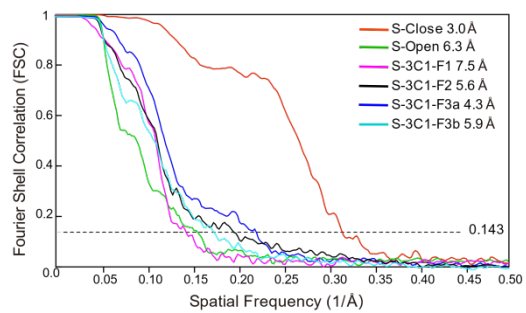**h**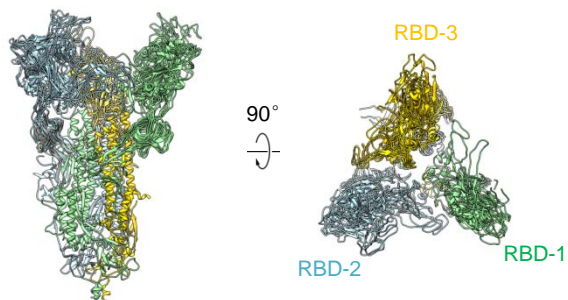**i**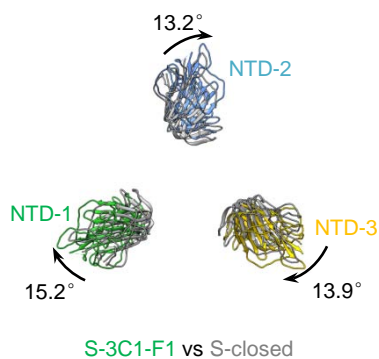

**Supplementary Figure 12.** Cryo-EM analysis on the SARS-CoV-2 S-3C1 complex. **(a)** A representative cryo-EM image of the S trimer in the presence of 3C1 Fab from 4517 micrographs is shown. Bar, 100nm. **(b)** Reference-free 2D class averages of the S-3C1 complex. **(c-f)** Side and top views of the cryo-EM maps of S-close (c), S-open (d), S-3C1-F1 (e), and S-3C1-F2 (f). **(g)** Resolution assessment of the cryo-EM reconstructions by FSC at 0.143 criterion. **(h)** Aligning the models corresponding to all the S-3C1 and S-2H2 maps together, reveals a dynamic conformational space of RBD (therefore the S1 subunit region) to coordinate the binding of 2H2/3C1 Fabs. To better render the RBD movement, the NTD was removed. **(i)** Overlaid NTDs of the S-3C1-F1 (in color) with the S-close state (in grey), revealing a clockwise untwist of S-3C1-F1.





**Supplementary Table 2. Contacting residues (a sidechain distance cutoff of 4 Å) at the SARS-CoV-2 RBD/2H2 interfaces**

| SARS-CoV-2 S RBD | 2H2                             |
|------------------|---------------------------------|
| R403             | L58, E59, S60                   |
| D405             | L58                             |
| K417*            | N57                             |
| V445             | Q1                              |
| G446*            | Q1                              |
| Y449*            | M106                            |
| Y453*            | Y53                             |
| L455*            | Y53, L54                        |
| F456*            | Y32                             |
| A475*            | D30, S31                        |
| V483             | R53, G54, G55                   |
| E484             | W52, R53, N98, H102             |
| G485             | W52, D58                        |
| F486*            | D98, D58                        |
| N487*            | N95, N96, H102                  |
| C488             | H102                            |
| Y489*            | S31, Y32, N95, G100, A101, H102 |
| F490             | G100                            |
| Q493*            | G99, G100, D105                 |
| G496*            | S60                             |
| Q498*            | S60, G61                        |
| N501*            | S60                             |
| Y505*            | L58, E59, S60, V62, P63, A64    |

Heavy chain

Light chain

\* ACE2 binding sites

Residues in coral indicate interactions also fulfill the criterion of < 8 Å main chain distance cutoff

**Supplementary Table 3. Contacting residues (a sidechain distance cutoff of 4 Å) at the SARS-CoV-2 RBD/3C1 interfaces**

| SARS-CoV-2 S RBD | 3C1                     |
|------------------|-------------------------|
| N501*            | T30                     |
| G502*            | Y53                     |
| V503             | N31, G32, Y33, Y53, Y99 |
| G504             | Y33, S52, S54           |
| Y505*            | S54                     |
| Q506             | N31, Y99                |
| Y508             | Y33, Y99                |
| V433             | R93                     |
| N437             | Y99                     |
| A411             | R93                     |
| Q414             | R93                     |
| R403             | S54, S56                |
| D405             | Y50, S52, S54, S56, Y58 |
| R408             | Y50, Y58, R93, Y94      |
| Q409             | Y58, R93                |
| I410             | R93                     |
| A372             | N31, W50                |
| F374             | D32                     |
| S375             | N92, R93                |
| T376             | N92, R93                |
| F377             | V29, N92                |
| K378             | I2, V29, Q90, N92, R93  |
| C379             | Q27                     |
| Y380             | R93                     |
| S383             | D28                     |
| P384             | D28                     |
| T385             | D28                     |
| Y369             | D28, G30, G68           |
| N370             | N31                     |

Heavy chain

Light chain

\* ACE2 binding sites

Residues in coral indicate interactions also fulfill the criterion of < 8 Å main chain distance cutoff

**Supplementary Table 4. A complete list of all primers used in this study**

| Plasmid or gene                      | Primer name      | Primer sequence                                                                   |
|--------------------------------------|------------------|-----------------------------------------------------------------------------------|
| pcDNA3.4-SARS-2-RBD (with Strep-tag) | optRBD-BamHI-F   | CATCggatcctgagccacccgagttcgaaggggaagcgtgcagcctaccgagtc                            |
|                                      | optRBD-HindIII-R | CCATAagctgctgtgccggtcagtc                                                         |
| pcDNA3.4-ACE2-hFc                    | ACE2-hFc-F       | tcctgactgggtgagggcccagtcaccattgaggaa                                              |
|                                      | ACE2-hFc-R       | ttgtcacaagattgggctcgaaacagggggctggtt                                              |
| pcDNA 3.1-SARS-2-S                   | Sp-F             | tagcgtttaaactaagcttatgttcgtttctgtgct                                              |
|                                      | Sp-685R          | agatgaggagcctgggagttgtctgggtc                                                     |
|                                      | Sp-686F          | actcccaggctccgcatctctgtggcaagccagtcctc                                            |
|                                      | Sp-987R          | cctcagggtgggtccagccggctcaggat                                                     |
|                                      | SP-988F          | gctggaccacctgagggcagaggtgcagatcgac                                                |
|                                      | SR-R             | acctcattcagcctgtcgtatctctctggatgttc                                               |
|                                      | SP1-F            | gacaggctgaatgaggtggccaagaatctgaacgagtcctgatcgtcagagctgg<br>gcaagtatgagcagggcagc   |
|                                      | SP1-R            | cagcaccactcgcctcctcctcagtaggcctggcctccctggggcctcaggatgta<br>gccgctgccctgctcacttg  |
|                                      | SP2-F            | gatggcagtggtgctgctgagcacctcctggaaaattatatttcaaggtgattacaagga<br>tgacgacgataagcctc |
|                                      | SP2-R            | tttaaacgggcccctcctagactcagtcgaatgggtgatgggtgatgggtgatgcttatcgtcgt<br>catcc        |
| pcDNA3.4-SARS-2-cRBD (Core)          | SARS-RBD(left)-F | actggggtgagggccggatccagggtgggtccatccggc                                           |
|                                      | SARS-RBD(left)-R | attgttctGTTCCAGGCCAGCACGCA                                                        |
|                                      | nCOV-RBD(rbm) -F | tggcctggaacAGCAACAATCTGGATAGCAAAGTG                                               |
|                                      | nCOV-RBD(rbm) -R | atgatggtgatggtgaagcttGCCTGTGCCGGTTCAGTCC                                          |
| pcDNA3.4-SARS-2-cRBD (RBM-M2)        | RBM-mut-2-F      | gtatctgagacacggcaagctgaggCCATTTCGAGAGGGACATCTCC                                   |
|                                      | RBM-mut-2-R      | tgccgtgtctcagataccgtactATAATTGTAGTTGCCGCCACT                                      |
| pcDNA3.4-SARS-2-cRBD (RBM-M3)        | RBM-mut-3-F      | ttcagcccagatggcaagCCCTGCAATGGCGTGGAG                                              |
|                                      | RBM-mut-3-R      | ttgccatctgggtgaaggccacattGGAGATGTCCCTCTCGAATGG                                    |
| pcDNA3.4-c3C1-hlgG1                  | 3C1-VH-F         | tcctgactgggtgagggccgaggtgcagcttcaggag                                             |
|                                      | 3C1-VH-R         | gatgggccccttggtgctagctgaggagactgtgagagt                                           |
| pcDNA3.4-c3C1-hk                     | 3C1-VL-F         | tcctgactgggtgagggccgacattgtgatgccagct                                             |
|                                      | 3C1-VL-R         | gatggtgcagccaccgtactgtttattccagcttgg                                              |
| pcDNA3.4-c2H2-hlgG1                  | 2H2-VH-F         | tcctgactgggtgagggcccaggtgcagctgaagcag                                             |
|                                      | 2H2-VH-R         | gatgggccccttggtgctagctgaggagacggtgactga                                           |
| pcDNA3.4-c2H2-hk                     | 2H2-VL-F         | tcctgactgggtgagggccaacattgtgctgacccaa                                             |
|                                      | 2H2-VL-R         | gatggtgcagccaccgtactgtttattccaacttgt                                              |
| pShuttle-CMV-hACE2                   | hACE2-KpnI-F     | CAACGGTACCatgcaagctcttctggctct                                                    |
|                                      | hACE2-XhoI-F     | CCATCTCGAGctaaaggaggtctgaacatcat                                                  |
| N gene (QPCR)                        | N-F              | GGGGAACCTCTCTGCTAGAAT                                                             |
|                                      | N-R              | CAGACATTTTGCTCTCAAGCTG                                                            |
| GAPDH gene (QPCR)                    | mGAPDH-F         | TGCCCAGAACATCATCCCTG                                                              |
|                                      | mGAPDH-R         | TCAGATCCACGACGGACACA                                                              |

Note that for pSecTag2A-SARS-RBD, gene synthesis and cloning was performed by GenScript (China).
